# Supplementary material for: In situ transmission electron microscopy observation of the deformation and fracture processes of an epoxy/silica nanocomposite
Source: Royal Society of Chemistry journal article supplement (doi:10.1039/d1sm01452h), 2021-12-23
Supplement: d1sm01452h1.pdf [file d1sm01452h1.pdf]

## Supporting Information

### ***In situ* transmission electron microscopy observation of the deformation and fracture processes of an epoxy/silica nanocomposite**

Pangpang Wang<sup>1</sup>, Ryusei Maeda<sup>2</sup>, Mika Aoki<sup>3</sup>, Tatsuya Kubozono<sup>1</sup>, Daisuke Yoshihara<sup>1</sup>, Atsuomi Shundo<sup>4</sup>, Takaya Kobayashi<sup>2</sup>, Satoru Yamamoto<sup>3</sup>, Keiji Tanaka<sup>3, 4</sup>, Sunao Yamada<sup>1</sup>

1. Materials Open Lab., Institute of Systems, Information Technologies and Nanotechnologies, Fukuoka 814-0001, Japan
2. Mechanical Design & Analysis Co., Tokyo 182-0024, Japan
3. Center for Polymer Interface and Molecular Adhesion Science, Kyushu University, Fukuoka 819-0395, Japan.
4. Department of Applied Chemistry, Kyushu University, Fukuoka 819-0395, Japan.

#### Step 1. Preparation of sacrificial pullulan layer

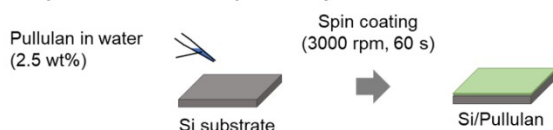

#### Step 2. Preparation of epoxy/silica mixture

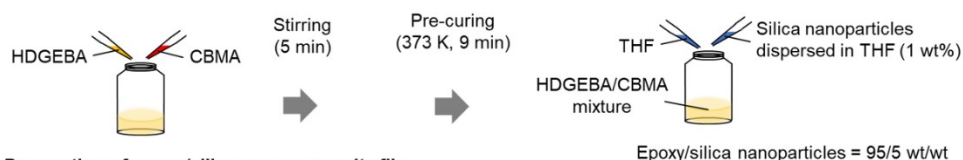

#### Step 3. Preparation of epoxy/silica nanocomposite film

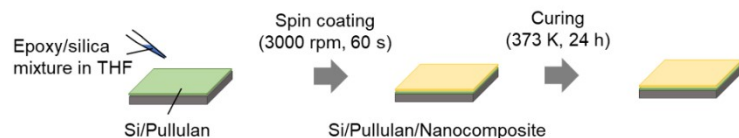

#### Step 4. Fabrication of free-standing nanocomposite film on TEM tensile cartridge

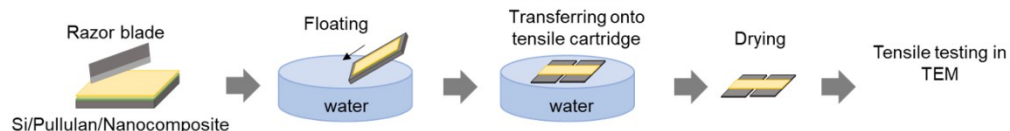

Figure S1. Preparation procedure of free-standing epoxy/silica nanocomposite thin film for *in situ* tensile test in TEM.

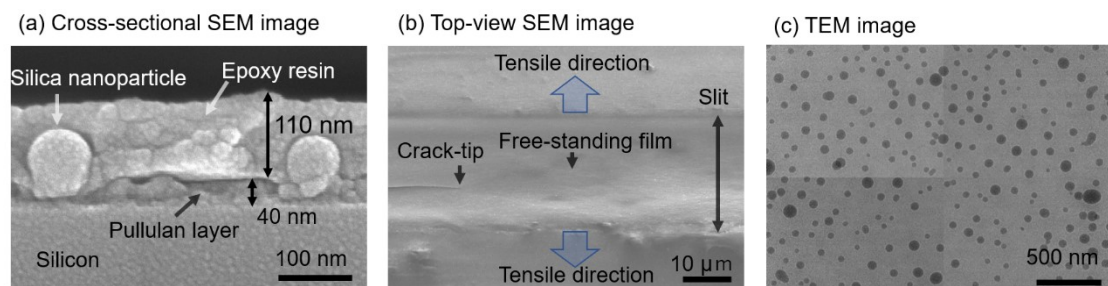

Figure S2. Electron microscopy images of the nanocomposite thin film: (a) Cross-sectional SEM image of a nanocomposite film on silicon/pullulan substrate; (b) Top-view SEM image of a free-standing nanocomposite film with a pre-existing crack attached on tensile cartridge; (c) TEM image of a free-standing nanocomposite thin film.

**Movie S1.** A 2 min 7 sec length movie at 4× speed of the deformation and fracture process of an epoxy/silica nanocomposite film under tensile strain observed using transmission electron microscopy. Scale bar: 1 μm.
